# Supplementary material for: N-(coumarin-3-yl)cinnamamide Promotes Immunomodulatory, Neuroprotective, and Lung Function-Preserving Effects during Severe Malaria
Source: MDPI journal article supplement (doi:10.3390/ph17010046), 2023-12-27
Supplement: s1 [file s1]

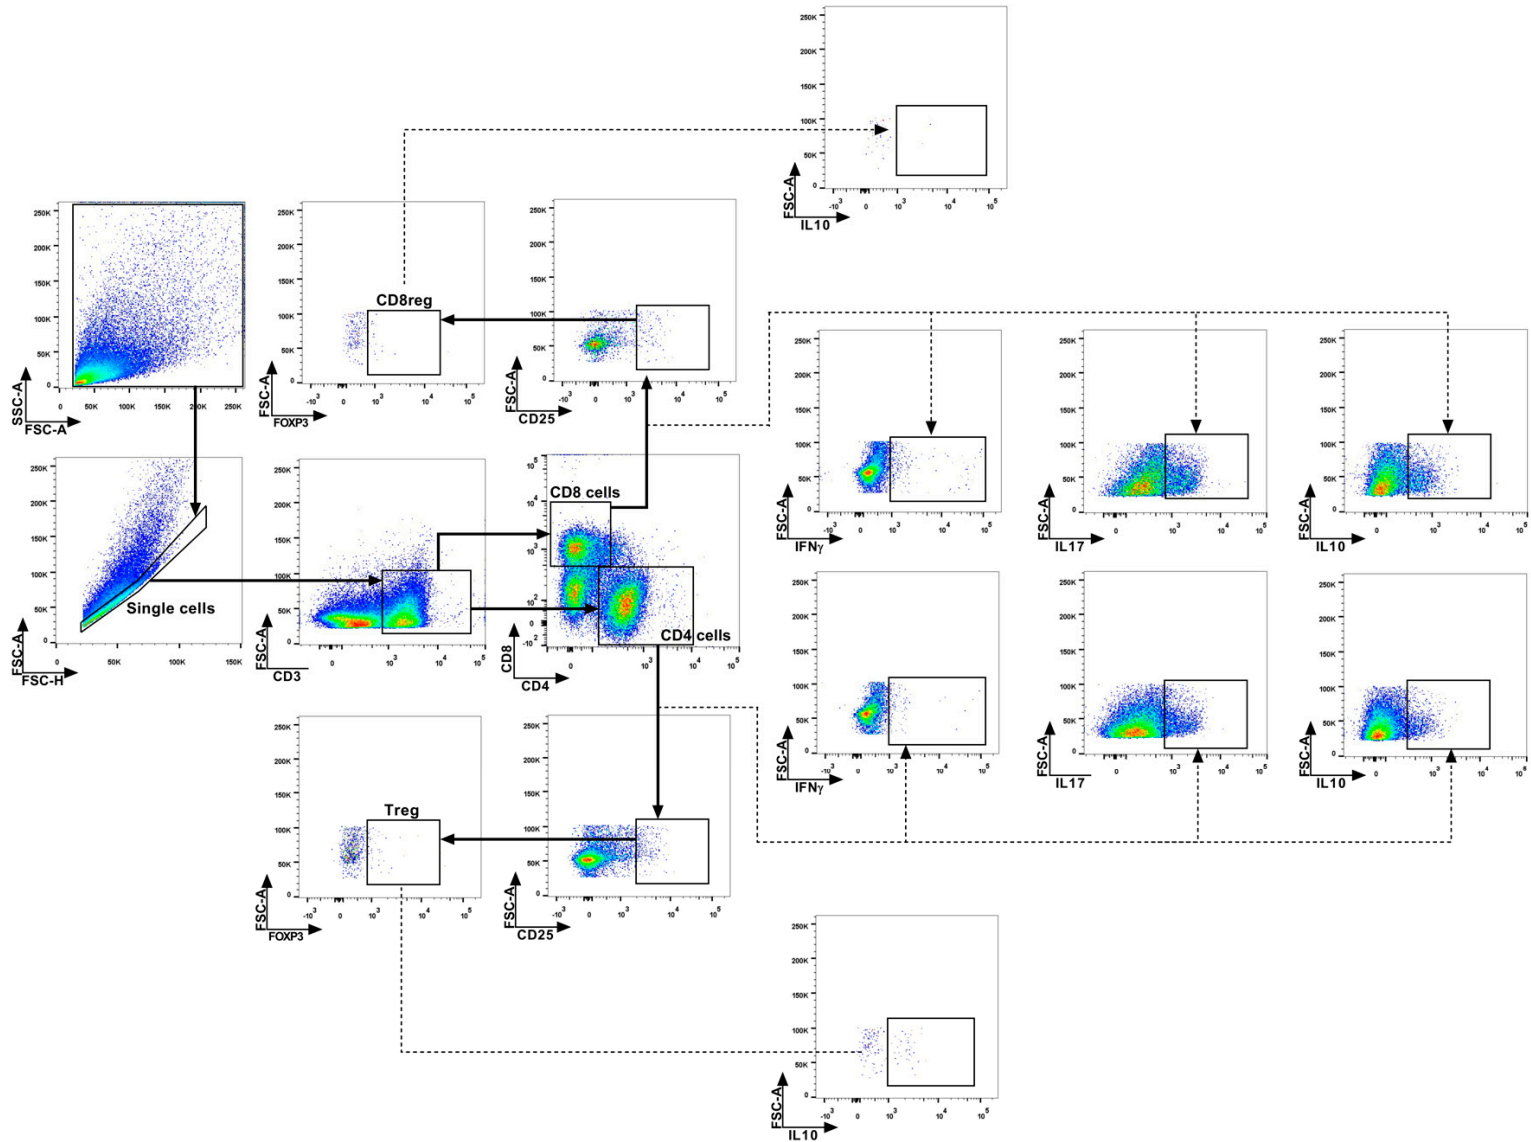

**Supplementary Figure S3.** A schematic representation of gating strategy for adaptive immune cells subpopulations isolated from spleen, lung and brain of mice and stained for IL-10, IFN- $\gamma$  and IL-17 cytokine production, and corresponding dotplots of: IL-10<sup>+</sup>CD4<sup>+</sup> T cells, IFN- $\gamma$ <sup>+</sup>CD4<sup>+</sup> T cells, IL-17<sup>+</sup>CD4<sup>+</sup> T cells; IL-10<sup>+</sup>CD8<sup>+</sup> T cells, IFN- $\gamma$ <sup>+</sup>CD8<sup>+</sup> T cells, IL-17<sup>+</sup>CD8<sup>+</sup> T cells; and IL-10<sup>+</sup>CD4<sup>+</sup>Treg cells and IL-10<sup>+</sup>CD8<sup>+</sup>Treg cells
