# Supplementary material for: N-(coumarin-3-yl)cinnamamide Promotes Immunomodulatory, Neuroprotective, and Lung Function-Preserving Effects during Severe Malaria
Source: MDPI journal article supplement (doi:10.3390/ph17010046), 2023-12-27
Supplement: s1 [file s1]

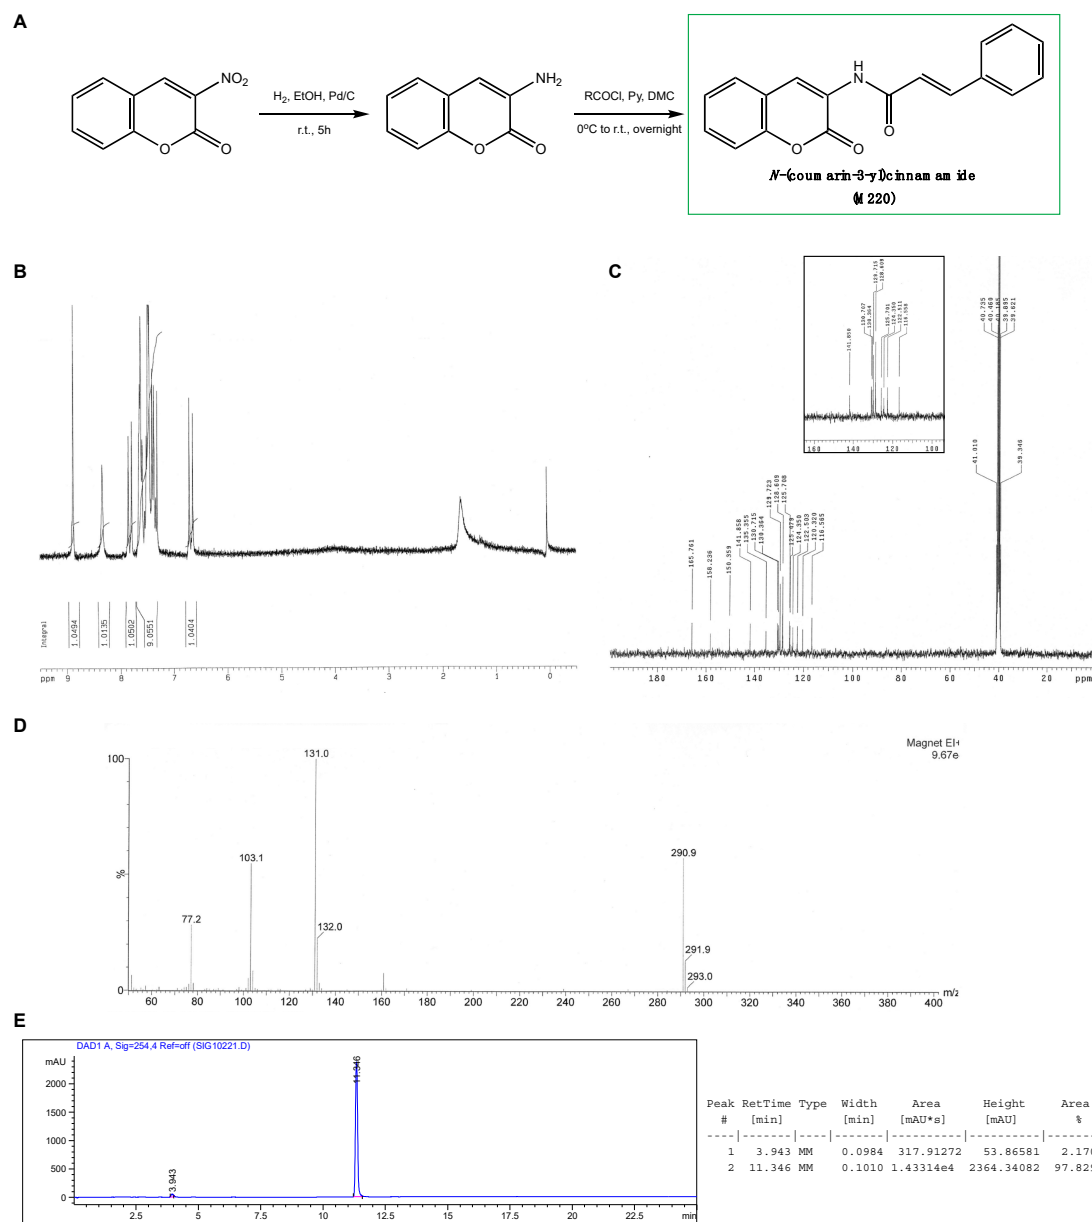

**Supplementary Figure S1. (A)** Synthetic methodology and reaction conditions for obtaining *N*-(coumarin-3-yl)cinnamamide (**M220**). The synthesis was performed in two steps, as described previously. **(B)** Proton nuclear magnetic resonance ( $^1\text{H}$  NMR) spectrum.  $^1\text{H}$  NMR spectroscopy was used to determine the chemical structure. The presence of a broad singlet at 8.34 ppm was compatible with the nitrogen proton of the amide group. In addition, the presence of a duplet at 6.68 ppm, with a coupling constant of 15.6 Hz, is compatible with the hydrogen of the double bond contiguous to the carbonyl group of the amide (a *trans* isomer). **(C)** Carbon nuclear magnetic resonance ( $^{13}\text{C}$  NMR) spectrum, with the DEPT spectrum in the black box. **(D)** Electron ionization (EI) mass spectrum. **(E)** High performance liquid chromatography (HPLC) trace and purity index.
