# Supplementary material for: N-(coumarin-3-yl)cinnamamide Promotes Immunomodulatory, Neuroprotective, and Lung Function-Preserving Effects during Severe Malaria
Source: MDPI journal article supplement (doi:10.3390/ph17010046), 2023-12-27
Supplement: s1 [file s1]

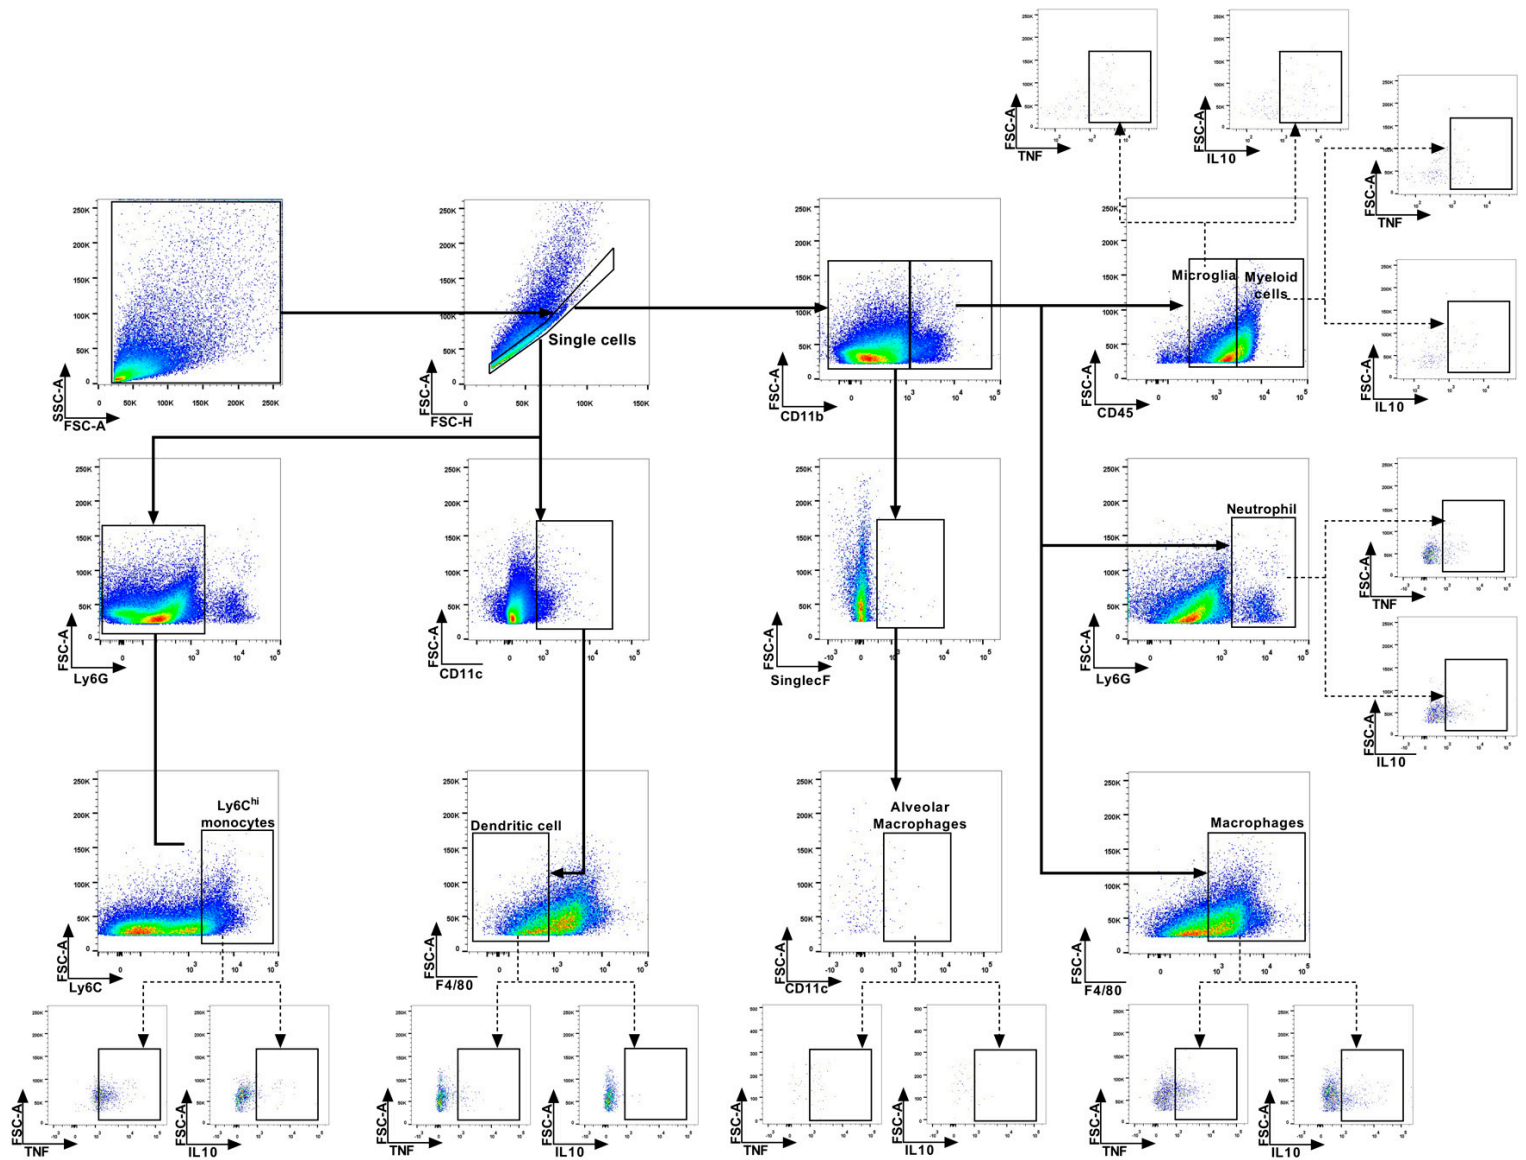

**Supplementary Figure S2.** A schematic representation of gating strategy for innate immune subpopulations isolated from spleen, lung and brain of mice and stained for IL-10 and TNF cytokine production, and corresponding dotplots of IL-10<sup>+</sup> macrophages (and/or alveolar macrophages and/or microglia), neutrophils, dendritic, and TNF<sup>+</sup> macrophages (and/or alveolar macrophages and/or microglia), neutrophils and dendritic cells.
